# Supplementary material
Source: publisher site journal article supplement (https://www.spandidos-publications.com/8532/downloadSupplementary)
Supplement: Supplementary file 1 [file downloadSupplementary]

## Sheet: Supplementary Table 3
Table SIII. The Cancer Genome Atlas glioblastoma survival data.
Sample	Score	Group	OS_time	OS_status
TCGA.02.0001	-0.433179	Low	11.8	1
TCGA.02.0003	-0.414772	Low	4.7	1
TCGA.02.0004	0.127297	High	11.3	1
TCGA.02.0007	-0.725245	Low	23.2	1
TCGA.02.0009	-0.328727	Low	10.6	1
TCGA.02.0010	-0.625019	Low	35.4	1
TCGA.02.0011	-1.00409	Low	20.7	1
TCGA.02.0014	-0.647112	Low	82.6	1
TCGA.02.0015	0.246804	High	20.6	1
TCGA.02.0016	-0.0666617	Low	87.1	1
TCGA.02.0021	-0.726274	Low	77.7	1
TCGA.02.0023	0.299462	High	20.1	1
TCGA.02.0024	-0.676919	Low	53.1	1
TCGA.02.0025	0.169201	High	42.7	1
TCGA.02.0026	-0.0731257	Low	24.6	1
TCGA.02.0027	-0.166847	Low	12.2	1
TCGA.02.0028	-0.420632	Low	90.6	1
TCGA.02.0033	-0.304129	Low	2.8	1
TCGA.02.0034	-0.169179	Low	14.1	1
TCGA.02.0038	-0.994538	Low	10.7	1
TCGA.02.0039	0.340339	High	10.5	1
TCGA.02.0043	-0.534037	Low	18.3	1
TCGA.02.0046	-0.45162	Low	6.9	1
TCGA.02.0047	-0.845177	Low	14.7	1
TCGA.02.0048	-0.146486	Low	3.2	1
TCGA.02.0051	0.235266	High	15.1	1
TCGA.02.0052	-0.467891	Low	12.6	1
TCGA.02.0054	-0.631452	Low	6.5	1
TCGA.02.0057	-0.442675	Low	19.9	1
TCGA.02.0058	-0.370019	Low	8.3	1
TCGA.02.0059	0.339933	High	9.6	1
TCGA.02.0060	-0.224187	Low	6	1
TCGA.02.0064	0.0384426	Low	19.7	1
TCGA.02.0068	0.138106	High	26.4	1
TCGA.02.0069	-0.630925	Low	28.7	0
TCGA.02.0070	0.241432	High	25.1	0
TCGA.02.0071	0.0649263	High	5.5	1
TCGA.02.0074	-0.185929	Low	10.2	1
TCGA.02.0075	0.116447	High	20.8	1
TCGA.02.0079	0.242822	High	27.2	1
TCGA.02.0080	-0.314083	Low	89.7	1
TCGA.02.0083	0.187075	High	22.7	1
TCGA.02.0084	-0.263669	Low	12.6	1
TCGA.02.0085	0.184143	High	51.3	1
TCGA.02.0086	0.247076	High	8.8	1
TCGA.02.0087	-0.165776	Low	57.8	0
TCGA.02.0089	0.270779	High	17	1
TCGA.02.0099	0.156905	High	3.5	1
TCGA.02.0102	0.028292	Low	27	1
TCGA.02.0104	-0.252958	Low	65	1
TCGA.02.0106	0.422454	High	11.7	1
TCGA.02.0107	0.320952	High	17.6	1
TCGA.02.0111	0.316976	High	23.2	1
TCGA.02.0113	0.0892596	High	92.7	0
TCGA.02.0114	-0.454786	Low	100	1
TCGA.02.0115	0.242929	High	15.7	1
TCGA.02.0116	-0.680842	Low	49	1
TCGA.02.0258	-0.435588	Low	16.5	1
TCGA.02.0260	-0.171033	Low	16.9	1
TCGA.02.0266	0.199599	High	17.7	1
TCGA.02.0269	-0.0510187	Low	10.8	1
TCGA.02.0271	0.275221	High	14.5	1
TCGA.02.0281	-0.454305	Low	4	1
TCGA.02.0285	0.271538	High	13.9	1
TCGA.02.0289	0.244089	High	14.2	1
TCGA.02.0290	0.147591	High	15.9	1
TCGA.02.0317	-0.000455795	Low	12.2	1
TCGA.02.0321	0.178045	High	9.9	1
TCGA.02.0324	0.0908279	High	7.7	1
TCGA.02.0325	-0.0582378	Low	10.6	1
TCGA.02.0326	-0.224587	Low	7.3	1
TCGA.02.0330	0.136898	High	15.9	1
TCGA.02.0332	0.0282767	Low	25.7	1
TCGA.02.0333	0.141289	High	4.4	1
TCGA.02.0337	0.0840094	High	25.1	1
TCGA.02.0338	-0.231809	Low	10.6	1
TCGA.02.0339	-0.30626	Low	12.4	1
TCGA.02.0422	0.211244	High	14.5	1
TCGA.02.0430	0.156242	High	10.6	1
TCGA.02.0432	-0.438914	Low	47.1	1
TCGA.02.0439	-0.0305132	Low	0.7	1
TCGA.02.0440	0.0399276	Low	11.3	1
TCGA.02.0446	0.143254	High	9.3	1
TCGA.02.0451	0.179559	High	16.2	1
TCGA.02.0456	-0.146411	Low	3.4	1
TCGA.02.2466	-0.342502	Low	16.8	1
TCGA.02.2470	0.258647	High	12.9	1
TCGA.02.2483	-0.196798	Low	15.3	0
TCGA.02.2485	0.147869	High	15.4	0
TCGA.02.2486	0.10707	High	20.3	1
TCGA.06.0122	0.15466	High	6.2	1
TCGA.06.0124	0.275156	High	20.4	1
TCGA.06.0125	-0.02454	Low	47.6	1
TCGA.06.0126	-0.107277	Low	6.9	1
TCGA.06.0127	0.0823043	High	4	1
TCGA.06.0128	-0.148824	Low	22.7	1
TCGA.06.0129	-0.377819	Low	33.7	1
TCGA.06.0130	-0.064057	Low	12.9	1
TCGA.06.0132	-0.0191021	Low	25.4	1
TCGA.06.0133	0.0773191	High	14.3	1
TCGA.06.0137	0.12467	High	26.7	1
TCGA.06.0138	0.178726	High	24.2	1
TCGA.06.0139	5.64688201463882e-05	Low	11.9	1
TCGA.06.0140	0.0938476	High	0.2	1
TCGA.06.0141	0.173936	High	10.3	1
TCGA.06.0142	-0.15169	Low	2.2	1
TCGA.06.0143	0.15618	High	11.7	1
TCGA.06.0145	-0.0255469	Low	2.3	1
TCGA.06.0146	-0.359155	Low	20.1	1
TCGA.06.0147	0.223246	High	17.8	1
TCGA.06.0148	0.240554	High	10.1	1
TCGA.06.0149	0.343451	High	8.6	1
TCGA.06.0152	0.0422651	Low	12.3	1
TCGA.06.0154	0.320693	High	13.9	1
TCGA.06.0155	-0.0136847	Low	10.4	1
TCGA.06.0156	0.0404292	Low	5.8	1
TCGA.06.0157	-0.100343	Low	3.2	1
TCGA.06.0158	0.0473067	Low	10.8	1
TCGA.06.0160	-0.309257	Low	11.8	1
TCGA.06.0162	0.109705	High	3.4	1
TCGA.06.0164	0.162458	High	56.9	1
TCGA.06.0166	0.0962308	High	5.8	1
TCGA.06.0167	-0.238928	Low	11.4	1
TCGA.06.0168	0.251056	High	19.7	1
TCGA.06.0169	0.21028	High	3.3	1
TCGA.06.0171	0.0111641	Low	13.1	1
TCGA.06.0173	0.0608342	High	4.5	1
TCGA.06.0174	-0.0631795	Low	3.2	1
TCGA.06.0175	0.0759101	High	4	1
TCGA.06.0176	0.172513	High	91	0
TCGA.06.0177	-0.066562	Low	4.2	1
TCGA.06.0178	-0.0808258	Low	88.1	1
TCGA.06.0179	0.141578	High	20.2	1
TCGA.06.0182	0.11091	High	3.6	1
TCGA.06.0184	0.275362	High	69.9	1
TCGA.06.0185	0.0715898	High	73.8	0
TCGA.06.0187	0.184329	High	27.2	1
TCGA.06.0188	0.0997845	High	44.6	1
TCGA.06.0189	0.192082	High	15.4	1
TCGA.06.0190	0.368768	High	10.4	1
TCGA.06.0192	0.0994824	High	39	1
TCGA.06.0194	0.197065	High	4.7	1
TCGA.06.0195	-0.127408	Low	7.4	1
TCGA.06.0197	0.151112	High	5.6	1
TCGA.06.0201	0.377582	High	0.4	1
TCGA.06.0206	0.0263018	Low	7.7	1
TCGA.06.0208	0.0972096	High	8.4	1
TCGA.06.0210	0.100655	High	7.4	1
TCGA.06.0211	0.0427796	Low	11.8	1
TCGA.06.0213	0.144782	High	0.5	1
TCGA.06.0214	0.113923	High	15	1
TCGA.06.0216	0.100264	High	24.2	1
TCGA.06.0219	0.152638	High	0.7	1
TCGA.06.0221	-0.0726779	Low	19.8	1
TCGA.06.0237	-0.0544134	Low	13.6	1
TCGA.06.0238	-0.0155649	Low	13.3	1
TCGA.06.0240	-0.122861	Low	20.4	1
TCGA.06.0241	-0.112437	Low	48.7	1
TCGA.06.0394	0.0943686	High	10.8	1
TCGA.06.0397	0.0798151	High	9	1
TCGA.06.0402	-0.00667865	Low	0.3	1
TCGA.06.0409	0.17761	High	72.4	1
TCGA.06.0410	0.0268348	Low	4.7	1
TCGA.06.0412	0.154489	High	9.6	1
TCGA.06.0413	-0.225082	Low	3.2	1
TCGA.06.0414	0.0055238	Low	35.1	1
TCGA.06.0644	0.275223	High	12.6	1
TCGA.06.0645	0.238261	High	5.8	1
TCGA.06.0646	0.146811	High	5.8	1
TCGA.06.0648	-0.0345394	Low	9.8	1
TCGA.06.0649	0.0360701	Low	2.1	1
TCGA.06.0650	0.103106	High	23.6	1
TCGA.06.0686	-0.158963	Low	14.2	1
TCGA.06.0743	-0.179521	Low	26.4	1
TCGA.06.0744	-0.110559	Low	46.9	1
TCGA.06.0745	0.014495	Low	7.9	1
TCGA.06.0747	0.13467	High	2.7	1
TCGA.06.0749	0.0746702	High	2.7	1
TCGA.06.0750	0.0732183	High	0.9	1
TCGA.06.0875	-0.319343	Low	43.5	0
TCGA.06.0876	0.139675	High	46.2	0
TCGA.06.0877	0.0863986	High	5.7	1
TCGA.06.0878	0.230162	High	7.2	0
TCGA.06.0879	0.180324	High	40.4	1
TCGA.06.0881	0.14641	High	16.6	1
TCGA.06.0882	0.0217395	Low	20.8	1
TCGA.06.0939	0.0252604	Low	26.8	1
TCGA.06.1084	0.126446	High	23.9	1
TCGA.06.1086	-0.3262	Low	6.8	1
TCGA.06.1087	-0.591224	Low	4	1
TCGA.06.1800	0.0157027	Low	26.8	1
TCGA.06.1801	-0.0283482	Low	11.8	1
TCGA.06.1802	0.108016	High	15.3	1
TCGA.06.1804	-0.329223	Low	13.6	1
TCGA.06.1805	-0.208254	Low	33.9	0
TCGA.06.2557	-0.139021	Low	1.1	1
TCGA.06.2558	-0.0931696	Low	12.5	1
TCGA.06.2559	0.0893135	High	4.9	1
TCGA.06.2561	0.0155428	Low	17.6	1
TCGA.06.2562	0.0497531	Low	12.6	1
TCGA.06.2563	-0.0989043	Low	30.6	0
TCGA.06.2564	0.00158598	Low	6	0
TCGA.06.2565	-0.149051	Low	16.6	1
TCGA.06.2566	-0.0224464	Low	6	1
TCGA.06.2567	0.0387137	Low	4.4	1
TCGA.06.2569	-0.705889	Low	0.4	0
TCGA.06.2570	-0.250286	Low	31.5	0
TCGA.06.5408	0.182294	High	11.7	1
TCGA.06.5410	0.257167	High	3.5	1
TCGA.06.5411	-0.00788283	Low	8.3	1
TCGA.06.5412	0.369534	High	4.5	1
TCGA.06.5413	0.00861757	Low	8.8	0
TCGA.06.5414	0.101499	High	9	0
TCGA.06.5415	0.125431	High	8.6	0
TCGA.06.5416	-0.103687	Low	6.7	0
TCGA.06.5417	-0.275325	Low	5.1	0
TCGA.06.5418	0.135437	High	2.7	1
TCGA.06.5856	0.183778	High	3.8	1
TCGA.06.5858	0.0404654	Low	6.2	0
TCGA.06.5859	0.0322323	Low	4.6	0
TCGA.06.6389	-0.306257	Low	7.8	0
TCGA.06.6390	-0.0452354	Low	5.4	1
TCGA.06.6391	-0.145765	Low	1.5	1
TCGA.08.0244	0.143978	High	22.7	1
TCGA.08.0245	-0.176068	Low	37.8	1
TCGA.08.0246	0.338535	High	4.2	1
TCGA.08.0344	-0.454863	Low	115.9	1
TCGA.08.0345	0.150646	High	1.7	1
TCGA.08.0346	0.188057	High	8.4	1
TCGA.08.0347	0.234751	High	25.7	1
TCGA.08.0348	-0.075187	Low	12.2	1
TCGA.08.0349	0.195672	High	9.8	1
TCGA.08.0350	-0.060641	Low	29.2	1
TCGA.08.0351	-0.0542195	Low	65.3	1
TCGA.08.0352	0.192764	High	1.3	1
TCGA.08.0353	0.0672037	High	8.4	1
TCGA.08.0354	0.361151	High	17.9	1
TCGA.08.0355	0.136754	High	24.6	1
TCGA.08.0356	0.267152	High	31.1	1
TCGA.08.0357	0.0654013	High	37.6	1
TCGA.08.0358	-0.132509	Low	22.3	1
TCGA.08.0359	0.255162	High	3.4	1
TCGA.08.0360	0.143399	High	15.4	1
TCGA.08.0373	0.0692506	High	4.4	1
TCGA.08.0375	-0.074922	Low	12.2	1
TCGA.08.0380	-0.105618	Low	14.9	1
TCGA.08.0385	-0.0923918	Low	2.7	1
TCGA.08.0386	-0.0161805	Low	18	1
TCGA.08.0389	0.122951	High	15.3	1
TCGA.08.0390	0.1895	High	14	1
TCGA.08.0392	-0.0283602	Low	0.7	1
TCGA.08.0509	0.0217121	Low	12.6	1
TCGA.08.0510	0.18516	High	4.3	1
TCGA.08.0511	0.153882	High	7.7	1
TCGA.08.0512	0.214995	High	42.1	1
TCGA.08.0514	0.22007	High	11.1	1
TCGA.08.0516	-0.0376773	Low	19.6	1
TCGA.08.0517	-0.0213563	Low	58.7	1
TCGA.08.0518	0.141363	High	19.3	1
TCGA.08.0520	0.139804	High	10.8	1
TCGA.08.0521	0.17703	High	4.8	1
TCGA.08.0522	0.150641	High	20.9	1
TCGA.08.0524	-0.612039	Low	7.3	1
TCGA.08.0525	0.335818	High	16	1
TCGA.08.0529	0.0966127	High	18.4	1
TCGA.08.0531	0.161718	High	7.6	1
TCGA.12.0616	-0.0824202	Low	14.7	1
TCGA.12.0618	-0.0767637	Low	13	1
TCGA.12.0619	0.161743	High	34.9	1
TCGA.12.0620	0.290304	High	10.4	1
TCGA.12.0654	0.0456102	Low	7.6	1
TCGA.12.0656	0.0108538	Low	94.8	1
TCGA.12.0657	0.216919	High	0.1	1
TCGA.12.0670	0.158613	High	26	1
TCGA.12.0688	0.155789	High	26.7	1
TCGA.12.0692	-0.116383	Low	3.6	1
TCGA.12.0703	0.174237	High	20.4	1
TCGA.12.0707	0.325018	High	28.4	1
TCGA.12.0772	0.366672	High	53.9	1
TCGA.12.0773	0.245249	High	43.2	1
TCGA.12.0775	0.387864	High	7.6	1
TCGA.12.0776	0.268527	High	9.7	1
TCGA.12.0778	0.368951	High	14.9	1
TCGA.12.0780	0.125936	High	14.9	1
TCGA.12.0818	-0.292835	Low	91.8	1
TCGA.12.0819	0.0659388	High	24.8	1
TCGA.12.0820	0.0937686	High	18.5	1
TCGA.12.0821	-0.0221119	Low	10.6	1
TCGA.12.0822	0.177992	High	23.5	1
TCGA.12.0826	0.0205551	Low	27.8	1
TCGA.12.0827	0.0777575	High	38.8	1
TCGA.12.0828	0.230442	High	8.9	1
TCGA.12.0829	0.199012	High	20.6	1
TCGA.12.1088	0.118033	High	127.6	1
TCGA.12.1089	-0.0719807	Low	5.8	1
TCGA.12.1090	0.0760411	High	7.6	1
TCGA.12.1091	-0.0503823	Low	33.2	1
TCGA.12.1092	0.148761	High	21.7	1
TCGA.12.1093	0.133514	High	16	1
TCGA.12.1094	0.227971	High	12.2	1
TCGA.12.1095	0.114943	High	15.8	1
TCGA.12.1096	0.148366	High	9.1	1
TCGA.12.1097	0.195538	High	14.5	1
TCGA.12.1098	-0.0117477	Low	4	1
TCGA.12.1099	0.0773834	High	4.1	1
TCGA.12.1597	0.0390727	Low	22.2	1
TCGA.12.1598	0.112602	High	15.7	1
TCGA.12.1599	0.302405	High	25.7	1
TCGA.12.1600	-0.0970082	Low	14.7	1
TCGA.12.1602	0.306701	High	6.8	1
TCGA.12.3644	0.0991656	High	59.8	1
TCGA.12.3646	0.062806	High	44	1
TCGA.12.3648	0.0518427	Low	26.9	1
TCGA.12.3649	0.107474	High	15.2	1
TCGA.12.3650	0.0104896	Low	10.9	1
TCGA.12.3651	-0.0644596	Low	12.7	1
TCGA.12.3652	0.179008	High	34.9	1
TCGA.12.3653	-0.0417975	Low	14.5	1
TCGA.12.5295	0.0520998	Low	14.9	1
TCGA.12.5299	0.198279	High	3.2	1
TCGA.12.5301	0.182739	High	2	1
TCGA.14.0736	0.125056	High	15.1	1
TCGA.14.0781	0.177859	High	1	1
TCGA.14.0783	0.205377	High	6.2	1
TCGA.14.0786	0.0116886	Low	23.1	1
TCGA.14.0787	-0.0436471	Low	2.2	1
TCGA.14.0789	0.309361	High	11.2	1
TCGA.14.0790	0.0267314	Low	13.8	1
TCGA.14.0812	0.148356	High	3.2	1
TCGA.14.0813	0.00888422	Low	1.4	1
TCGA.14.0817	0.208772	High	5.4	1
TCGA.14.0865	-0.148023	Low	16.5	1
TCGA.14.0866	0.124256	High	26.3	1
TCGA.14.0867	0.146618	High	2	1
TCGA.14.0871	-0.74413	Low	28.9	1
TCGA.14.1034	0.16125	High	15.9	1
TCGA.14.1037	0.227468	High	19.3	1
TCGA.14.1396	0.108736	High	1.1	1
TCGA.14.1401	0.0264835	Low	3.8	1
TCGA.14.1402	0.21891	High	32	1
TCGA.14.1451	0.194991	High	23.1	1
TCGA.14.1452	0.107922	High	7.1	1
TCGA.14.1453	0.017561	Low	1.1	1
TCGA.14.1454	-0.299144	Low	30.2	1
TCGA.14.1455	0.033523	Low	0.9	1
TCGA.14.1456	-0.218347	Low	41	0
TCGA.14.1458	-0.206476	Low	6.7	1
TCGA.14.1459	0.165036	High	12.4	1
TCGA.14.1794	0.0544704	Low	1	1
TCGA.14.1795	-0.00299638	Low	2	1
TCGA.14.1821	-0.696666	Low	17.8	1
TCGA.14.1823	0.133342	High	17.9	1
TCGA.14.1825	-0.203397	Low	7.6	1
TCGA.14.1827	0.106161	High	5.9	1
TCGA.14.1829	0.0337348	Low	7.2	0
TCGA.14.2554	0.0535249	Low	17.5	1
TCGA.14.2555	0.132147	High	8	0
TCGA.14.3476	0.0244142	Low	0.4	1
TCGA.14.3477	-0.300344	Low	3.8	0
TCGA.14.4157	-0.492385	Low	3.4	0
TCGA.15.0742	-0.258953	Low	13.8	1
TCGA.15.1444	-0.080678	Low	50.5	1
TCGA.15.1446	0.15938	High	19.1	0
TCGA.15.1447	-0.216117	Low	53.2	0
TCGA.15.1449	-0.293703	Low	13.3	1
TCGA.16.0846	0.112355	High	3.9	1
TCGA.16.0848	0.0559664	High	17.6	1
TCGA.16.0849	-0.217225	Low	26.1	0
TCGA.16.0850	-0.459466	Low	16.4	1
TCGA.16.0861	0.0786735	High	4.3	0
TCGA.16.1045	0.195306	High	29	1
TCGA.16.1047	0.0144903	Low	4.6	1
TCGA.16.1055	0.167577	High	10.3	1
TCGA.16.1056	-0.137863	Low	14	1
TCGA.16.1060	0.22613	High	9.1	1
TCGA.16.1062	0.0558726	Low	21.2	1
TCGA.16.1063	-0.0166802	Low	14	1
TCGA.16.1460	-0.17455	Low	6.4	0
TCGA.19.0955	0.110463	High	11.8	0
TCGA.19.0957	-0.0753041	Low	21.9	1
TCGA.19.0960	-0.249631	Low	8.6	0
TCGA.19.0962	0.0436406	Low	0.7	1
TCGA.19.0963	-0.0752738	Low	14.3	1
TCGA.19.0964	0.00728495	Low	3.4	0
TCGA.19.1385	0.192434	High	10.8	1
TCGA.19.1386	0.0182014	Low	9.1	1
TCGA.19.1387	0.0571046	High	6	0
TCGA.19.1388	-0.0970085	Low	12.9	1
TCGA.19.1389	0.318369	High	4.6	1
TCGA.19.1390	-0.558283	Low	25.4	1
TCGA.19.1392	-0.136417	Low	3.6	1
TCGA.19.1786	0.126427	High	7.2	0
TCGA.19.1787	0.0522542	Low	12.7	1
TCGA.19.1788	-0.19398	Low	3.7	1
TCGA.19.1789	-0.227525	Low	3.2	1
TCGA.19.1790	0.274999	High	5.1	1
TCGA.19.1791	-0.285052	Low	0.1	0
TCGA.19.2619	0.211478	High	9.7	0
TCGA.19.2620	0.169331	High	4.9	1
TCGA.19.2621	0.0298321	Low	1.1	1
TCGA.19.2623	0.284394	High	7.5	0
TCGA.19.2624	-0.120081	Low	0.2	1
TCGA.19.2625	0.196378	High	4.1	1
TCGA.19.2629	-0.0479986	Low	24.2	1
TCGA.19.2631	0.0641172	High	7	1
TCGA.19.4068	0.0513686	Low	4.5	0
TCGA.19.5947	0.134714	High	6.6	1
TCGA.19.5950	0.0731779	High	17.2	1
TCGA.19.5951	-0.0493434	Low	8	1
TCGA.19.5952	0.412124	High	18.9	1
TCGA.19.5954	0.311796	High	12.1	1
TCGA.19.5955	0.119717	High	1.8	1
TCGA.19.5956	-0.303466	Low	22.5	1
TCGA.19.5958	0.141073	High	14.1	1
TCGA.19.5959	0.00965418	Low	16.8	1
TCGA.19.5960	-0.253975	Low	15	1
TCGA.26.1438	0.0786889	High	10	0
TCGA.26.1439	0.0233212	Low	13.9	1
TCGA.26.1440	-0.0812529	Low	9.7	0
TCGA.26.1442	-0.371766	Low	31.3	0
TCGA.26.1443	0.0351572	Low	7.1	0
TCGA.26.1799	0.0305999	Low	9.4	1
TCGA.26.5132	0.0821509	High	9.4	0
TCGA.26.5133	-0.169441	Low	14.9	0
TCGA.26.5134	-0.0623849	Low	5.5	0
TCGA.26.5135	0.000805076	Low	8.9	1
TCGA.26.5136	-0.32218	Low	19	1
TCGA.26.5139	-0.329568	Low	1.6	0
TCGA.27.1830	0.170134	High	5.1	1
TCGA.27.1831	0.0826519	High	16.6	1
TCGA.27.1832	0.272096	High	9.9	1
TCGA.27.1833	0.0531617	Low	24.2	1
TCGA.27.1834	-0.0281555	Low	40.5	1
TCGA.27.1835	-0.21464	Low	21.3	1
TCGA.27.1836	-0.016135	Low	30.1	1
TCGA.27.1837	-0.00821449	Low	14	1
TCGA.27.1838	0.148132	High	11.5	1
TCGA.27.2518	0.084641	High	24.8	1
TCGA.27.2519	0.0386184	Low	18.1	1
TCGA.27.2521	-0.15792	Low	10.4	0
TCGA.27.2523	-0.27871	Low	16.1	1
TCGA.27.2524	0.280971	High	7.6	1
TCGA.27.2526	0.158896	High	2.9	1
TCGA.27.2527	-0.0280657	Low	14.4	1
TCGA.27.2528	0.0154458	Low	15.8	1
TCGA.28.1745	-0.0776462	Low	11.3	0
TCGA.28.1746	-0.0439657	Low	0.2	0
TCGA.28.1747	0.140666	High	2.5	1
TCGA.28.1749	-0.00888514	Low	9.2	0
TCGA.28.1750	-0.0815475	Low	8.3	0
TCGA.28.1751	0.154328	High	7.6	0
TCGA.28.1752	0.150669	High	8.5	0
TCGA.28.1753	0.117539	High	1.2	0
TCGA.28.1755	-0.149603	Low	1.6	1
TCGA.28.1756	-0.356028	Low	2.8	0
TCGA.28.1757	0.235471	High	0.1	0
TCGA.28.1760	0.287548	High	4.7	0
TCGA.28.2502	0.26654	High	0.7	0
TCGA.28.2506	-0.0370523	Low	6.7	0
TCGA.28.2509	0.306479	High	4.8	0
TCGA.28.2513	0.24115	High	7.3	0
TCGA.28.2514	0.000571412	Low	5.3	0
TCGA.28.5204	-0.741699	Low	14.9	1
TCGA.28.5207	-0.461353	Low	11.3	1
TCGA.28.5208	-0.393827	Low	17.9	1
TCGA.28.5209	-0.352132	Low	2.5	0
TCGA.28.5213	-0.510918	Low	31.3	0
TCGA.28.5214	-0.540614	Low	23.4	1
TCGA.28.5215	-0.204463	Low	11	1
TCGA.28.5216	-0.577367	Low	13.6	0
TCGA.28.5218	-0.627244	Low	5.2	1
TCGA.28.5219	0.160779	High	22.7	0
TCGA.28.5220	0.136795	High	10.5	0
TCGA.28.6450	-0.0833713	Low	5.4	1
TCGA.32.1970	0.0321318	Low	15.4	1
TCGA.32.1973	-0.175183	Low	21.1	1
TCGA.32.1976	-0.0953305	Low	0.5	1
TCGA.32.1977	0.272749	High	0.1	0
TCGA.32.1978	-0.179953	Low	15.8	1
TCGA.32.1979	0.175685	High	19.5	1
TCGA.32.1980	0.0884692	High	1.2	1
TCGA.32.1982	0.133378	High	4.7	1
TCGA.32.1986	0.220327	High	12.7	1
TCGA.32.1987	0.10612	High	14.9	1
TCGA.32.1991	0.285261	High	16.9	1
TCGA.32.2491	0.166426	High	12.2	1
TCGA.32.2494	0.0652978	High	20.8	1
TCGA.32.2495	0.147907	High	15	1
TCGA.32.2615	0.132473	High	15.9	1
TCGA.32.2616	0.127044	High	7.4	1
TCGA.32.2632	0.1594	High	8.8	1
TCGA.32.2634	-0.063312	Low	22.8	0
TCGA.32.2638	0.135245	High	25.2	1
TCGA.32.4208	-0.0585964	Low	21.1	0
TCGA.32.4209	0.145454	High	20.3	1
TCGA.32.4210	-0.134995	Low	3.7	1
TCGA.32.4211	0.216037	High	12.6	1
TCGA.32.4213	0.191391	High	19.9	0
TCGA.32.4719	0.175418	High	10.8	1
TCGA.32.5222	-0.0734642	Low	19.2	1
TCGA.41.2571	-0.0773954	Low	0.8	1
TCGA.41.2572	0.169867	High	13.3	1
TCGA.41.2573	0.0948061	High	8.9	0
TCGA.41.2575	-0.0196748	Low	9.5	1
TCGA.41.3392	0.262128	High	1	1
TCGA.41.3393	-0.0374269	Low	4.4	1
TCGA.41.3915	0.146782	High	11.8	1
TCGA.41.4097	0.135497	High	0.2	1
TCGA.41.5651	-0.209075	Low	15.1	1
TCGA.76.4925	-0.295381	Low	4.8	1
TCGA.76.4926	0.140176	High	4.5	1
TCGA.76.4927	0.0992206	High	17.6	1
TCGA.76.4928	0.238328	High	3.1	1
TCGA.76.4929	0.155685	High	3.6	1
TCGA.76.4931	0.138959	High	9.2	1
TCGA.76.4932	-0.155284	Low	47.9	1
TCGA.76.4934	-0.0778081	Low	2.5	1
TCGA.76.4935	0.00255686	Low	36.9	1
TCGA.76.6191	-0.145697	Low	16.7	1
TCGA.76.6192	0.128415	High	3.3	1
TCGA.76.6193	0.128411	High	2.7	1
TCGA.76.6282	0.15485	High	17.1	1
TCGA.76.6285	-0.0251747	Low	8.3	1
TCGA.81.5910	0.234334	High	1.6	1
TCGA.87.5896	-0.0668793	Low	26.3	0
Notes: TCGA_GBM clinical and transcriptomic data were obtained from the GlioVis portal (http://gliovis.bioinfo.cnio.es/) and subjected to the TCGA data usage policy (28). Clinical and expression data for 525 patients with GBM from The Cancer Genome Atlas (TCGA_GBM). Contains individual signature scores, median-based stratification (high/low), and overall survival data used to generate Kaplan–Meie…
